# Supplementary material
Source: publisher figshare collection journal article supplement (https://diabetesjournals.figshare.com/articles/dataset/_/22595938)
Supplement: Supplementary file 3 [file 1]

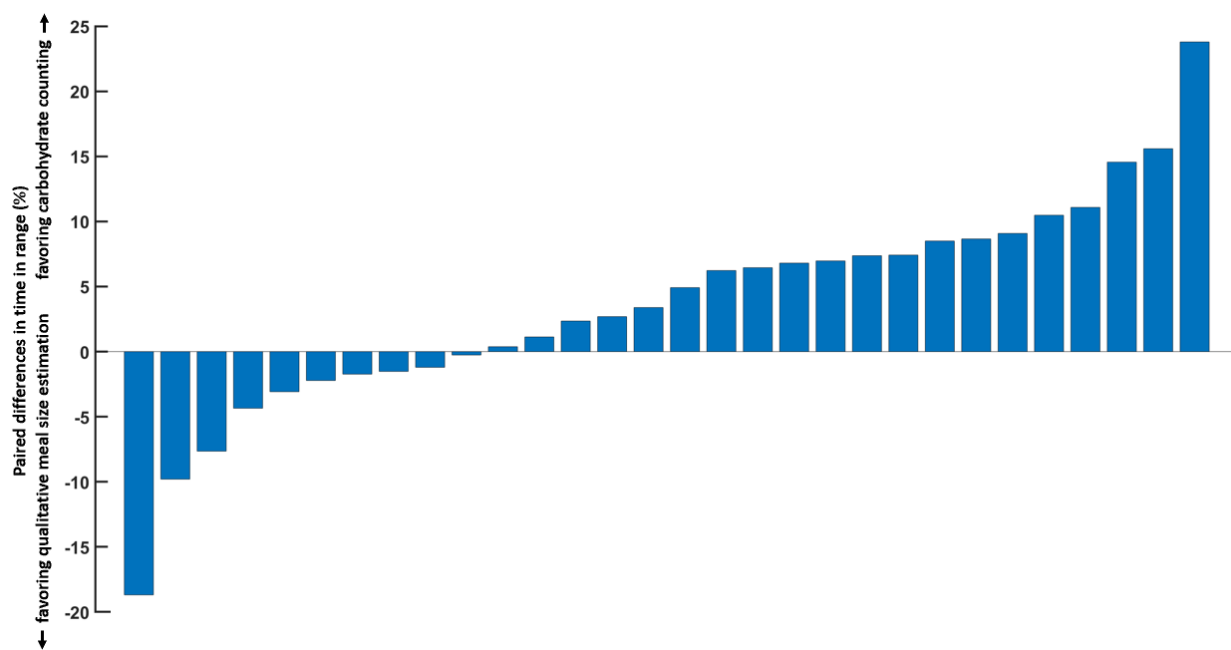

**Supplementary Figure 2.** The individual paired differences in the time in target range between the carbohydrate counting and qualitative meal-size estimation arms (n=30).
